# Supplementary material for: Lithium deintercalation behavior in Li-rich vanadium phosphate as a potential cathode for Li-ion batteries
Source: Royal Society of Chemistry journal article supplement (doi:10.1039/c1jm12291f), 2011-01-01
Supplement: c1jm12291f.pdf [file c1jm12291f.pdf]

## Supporting Information

### Lithium deintercalation behavior in Li-rich vanadium phosphate as a potential cathode for Li-ion batteries

Quan Kuang,<sup>a</sup> Zhiping Lin,<sup>a,b</sup> Yanming Zhao,<sup>\*a,c</sup> Xiaolong Chen,<sup>d</sup> and Liquan Chen<sup>d</sup>

<sup>a</sup> School of Materials, South China University of Technology, Guangzhou 510640, P. R. China

<sup>b</sup> School of Physics, Guangdong University of Technology, Guangzhou 510090, P. R. China

<sup>c</sup> Department of Physics, South China University of Technology, Guangzhou 510640, P. R. China

<sup>d</sup> Institute of Physics, Chinese Academy Science, Beijing 100080, P. R. China

**Table S1.** Structure parameters of  $\text{Li}_9\text{V}_3(\text{P}_2\text{O}_7)_3(\text{PO}_4)_2$  determined from Rietveld refinement of high power X-ray diffraction at 300 K and first-principles density functional calculations (enclosed in parentheses).

| Atoms | Wyckoff Sites | x                  | y                  | z                  | Occupancy |
|-------|---------------|--------------------|--------------------|--------------------|-----------|
| P(1)  | 4d            | 2/3<br>(0.6667)    | 1/3<br>(0.3333)    | 0.6245<br>(0.6228) | 1.00      |
| P(2)  | 12g           | 0.3157<br>(0.3146) | 0.0883<br>(0.0877) | 0.8454<br>(0.8462) | 1.00      |
| V     | 6f            | 0.5679<br>(0.5692) | 0<br>(0)           | 3/4<br>(0.75)      | 1.00      |
| Li(1) | 2b            | 0<br>(0)           | 0<br>(0)           | 0<br>(0)           | 1.00      |
| Li(2) | 4d            | 2/3<br>(0.6667)    | 1/3<br>(0.3334)    | 0.8846<br>(0.8752) | 1.00      |
| Li(3) | 12g           | 0.3364<br>(0.3377) | 0.1016<br>(0.0997) | 0.0622<br>(0.0615) | 1.00      |
| O(1)  | 4d            | 2/3<br>(0.6667)    | 1/3<br>(0.3333)    | 0.5131<br>(0.5108) | 1.00      |
| O(2)  | 6f            | 0.2105<br>(0.2089) | 0<br>(0)           | 3/4<br>(0.75)      | 1.00      |
| O(3)  | 12g           | 0.6763<br>(0.6795) | 0.1878<br>(0.1893) | 0.6638<br>(0.6633) | 1.00      |
| O(4)  | 12g           | 0.4798<br>(0.4814) | 0.1052<br>(0.1069) | 0.8355<br>(0.8348) | 1.00      |
| O(5)  | 12g           | 0.3292<br>(0.3284) | 0.2536<br>(0.2523) | 0.8451<br>(0.8476) | 1.00      |
| O(6)  | 12g           | 0.2229<br>(0.2222) | 0.9937<br>(0.9918) | 0.9356<br>(0.9364) | 1.00      |

Space group:  $P\bar{3}c1$  (trigonal), unit cell parameters:  $a=b=9.737$  (9.6761) Å,  $c=13.615$  (13.4806) Å,  $\alpha=\beta=90^\circ$ ,  $\gamma=120^\circ$ . Cell volume: 1117.89 (1093.31) Å<sup>3</sup>. Reliability factors— $R_p$ : 7.5%,  $R_{wp}$ : 11.8%.
